# Supplementary material for: Recognition of the small regulatory RNA RydC by the bacterial Hfq protein
Source: eLife journal article supplement (doi:10.7554/elife.05375), 2014-12-30
Supplement: supp [file elife-05375-supp-v1.zip]

| Atom 1 | Atom 2 | Distance (Å) |
|--------|--------|--------------|
|--------|--------|--------------|

***RydC UU pairs main contacts***

|           |         |      |
|-----------|---------|------|
| ARG16/NH2 | U23/O5' | 3.12 |
| ARG16/NH2 | U23/OP1 | 3.09 |
| ARG16/NH2 | U23/O2  | 2.86 |
| ASN13/ND2 | U24/O5' | 3.28 |
| ASN13/ND2 | U24/OP1 | 3.33 |
| ASN13/ND2 | U24/O2  | 2.86 |
| GLY4/N    | U24/O4' | 2.94 |
| PHE39/N   | U24/O4  | 2.76 |
| ARG16/NH1 | U46/OP2 | 3.05 |
| GLN5/NE2  | U46/O2  | 3.01 |
| GLN5/N    | U46/O2  | 3.22 |
| ASN13/ND2 | U47/OP1 | 3.07 |
| ARG16/NH2 | U47/OP1 | 3.14 |
| PHE39/N   | U47/O4  | 3.33 |
| PHE39/O   | U47/N3  | 2.97 |
