# Supplementary material for: Recognition of the small regulatory RNA RydC by the bacterial Hfq protein
Source: eLife journal article supplement (doi:10.7554/elife.05375), 2014-12-30
Supplement: supp [file elife-05375-supp-v1.zip]

| Atom 1                                  | Atom 2 | Distance (Å) |
|-----------------------------------------|--------|--------------|
| <b><i>RydC 5' end main contacts</i></b> |        |              |
| ARG17/NH2                               | G8/N3  | 3.10         |
| HIS71/NE2                               | G8/O6  | 2.22         |
| ARG16/NH2                               | U9/OP1 | 3.13         |
| ASN13/ND2                               | U9/O5' | 3.19         |
| PHE39/O                                 | U9/N3  | 3.27         |

|                                         |          |      |
|-----------------------------------------|----------|------|
| <b><i>RydC 3' end main contacts</i></b> |          |      |
| LYS56/NZ                                | U62/O2   | 3.16 |
| GLN41/O                                 | U62/N3   | 3.03 |
| GLN8/NE2                                | U62/O2   | 2.61 |
| HIS57/ND1                               | U62/O2'  | 3.14 |
| GLN8/NE2                                | C63/O2   | 3.13 |
| HIS57/ND1                               | C63/O2'  | 2.73 |
| GLN41/O                                 | C63/N3   | 3.73 |
| GLN41/NE2                               | U64/O4   | 2.69 |
| GLN41/O                                 | U64/N3   | 3.27 |
| HIS57/ND1                               | U64/O2'  | 2.21 |
| GLN8/NE2                                | U64/O2   | 3.75 |
| LYS56/NZ                                | GLN41/O  | 3.17 |
| LYS56/NZ                                | GLN8/OE1 | 2.73 |
