# Supplementary material for: Recognition of the small regulatory RNA RydC by the bacterial Hfq protein
Source: eLife journal article supplement (doi:10.7554/elife.05375), 2014-12-30
Supplement: supp [file elife-05375-supp-v1.zip]

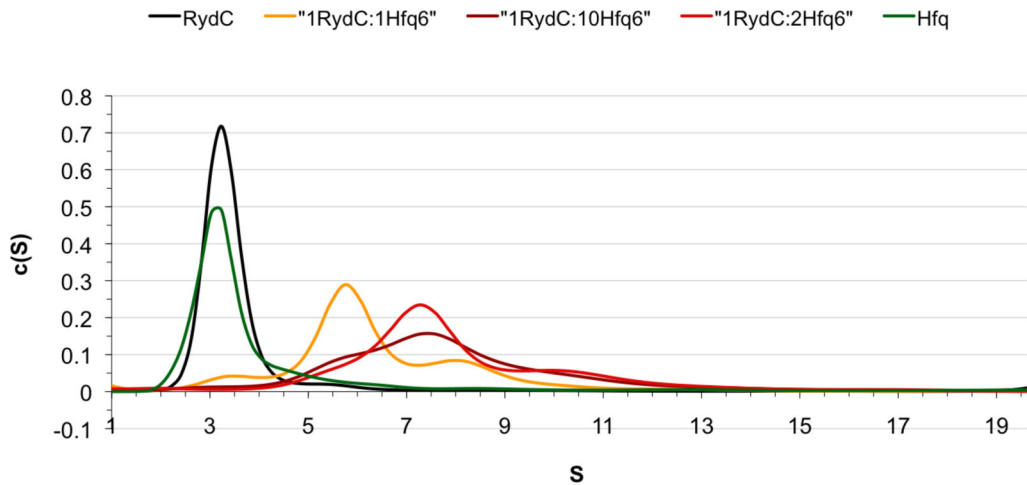

| SAMPLE           |                              | S coefficient | calculated M.W., kDa | expected M.W., kDa |
|------------------|------------------------------|---------------|----------------------|--------------------|
| <b>RydC</b>      | RydC alone                   | 3S            | ~ 24                 | 20                 |
| <b>Hfq</b>       | Hfq alone                    | 3S            | ~ 67                 | 67                 |
| <b>COMPLEX 1</b> | 1 RydC : 1 Hfq <sub>6</sub>  | 5,76S         | ~ 92                 | 87                 |
| <b>COMPLEX 2</b> | 1 RydC : 2 Hfq <sub>6</sub>  | 7,47S         | ~140                 | 154                |
|                  | 1 RydC : 10 Hfq <sub>6</sub> | 7,47S         |                      |                    |
