# Supplementary figures and images for: Recognition of the small regulatory RNA RydC by the bacterial Hfq protein
Source: eLife journal article supplement (doi:10.7554/elife.05375), 2014-12-30

**a**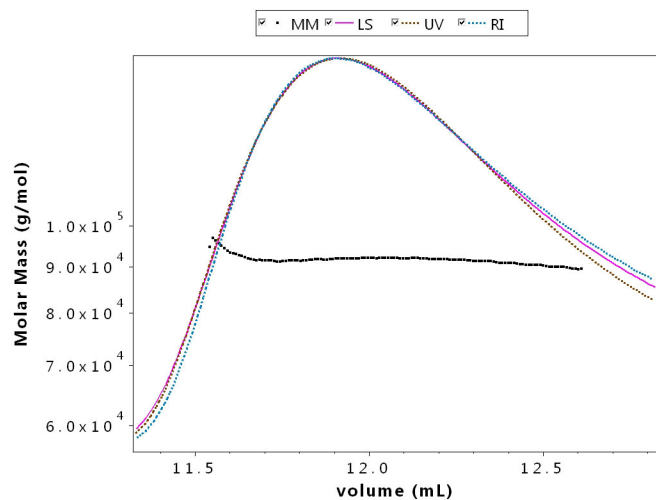

1. Marker
2. Hfq/RydC
3. Hfq:RydC (1:1) before loading
4. Peak fractions

**b**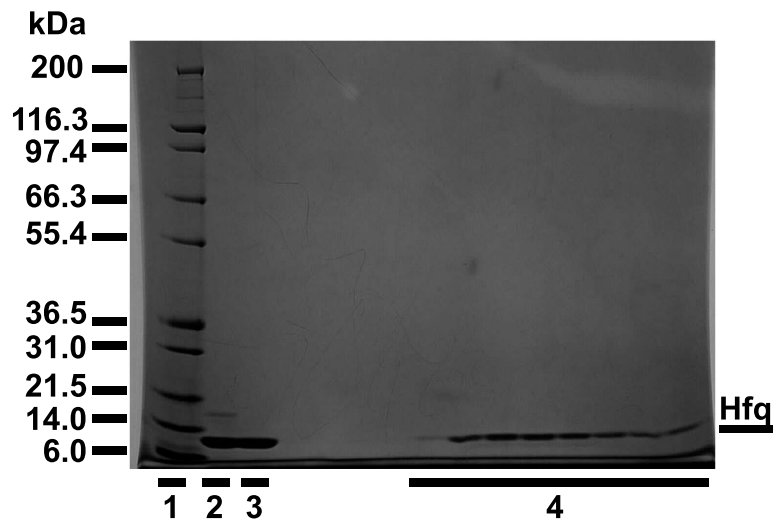**c**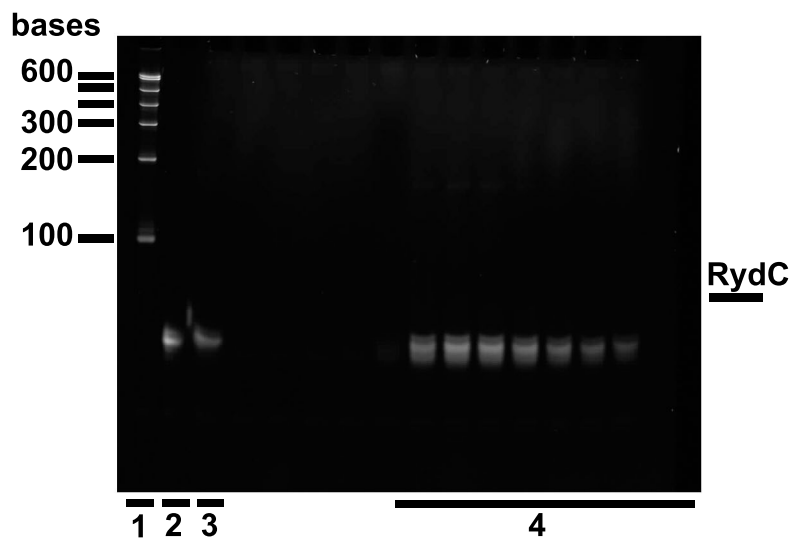

Supplement: supp [file elife-05375-supp-v1.zip]

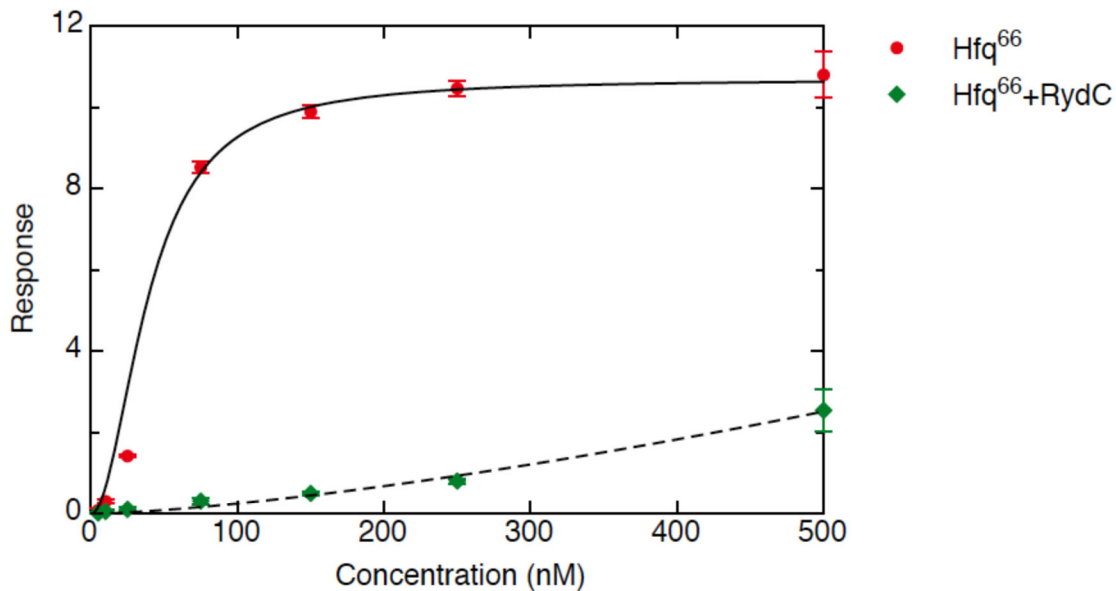

|                         | <b>K<sub>d</sub> (nM)</b> | <b>k<sub>on</sub> (1/M*s)</b>            |
|-------------------------|---------------------------|------------------------------------------|
| Hfq <sup>66</sup>       | 39.2±2.2                  | 3.1×10 <sup>4</sup> ±1.4×10 <sup>3</sup> |
| Hfq <sup>66</sup> +RydC | -                         | -                                        |

Supplement: supp [file elife-05375-supp-v1.zip]

**a**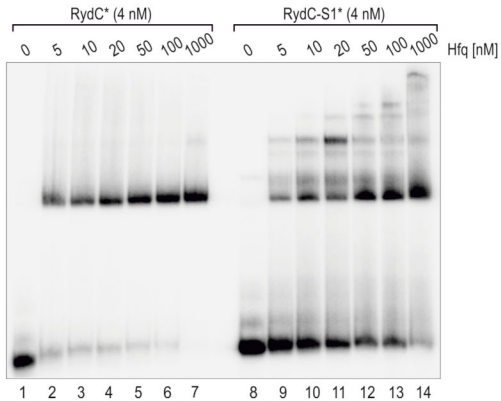**b**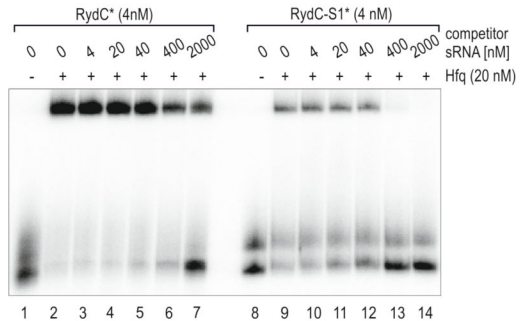

Supplement: supp [file elife-05375-supp-v1.zip]

**a**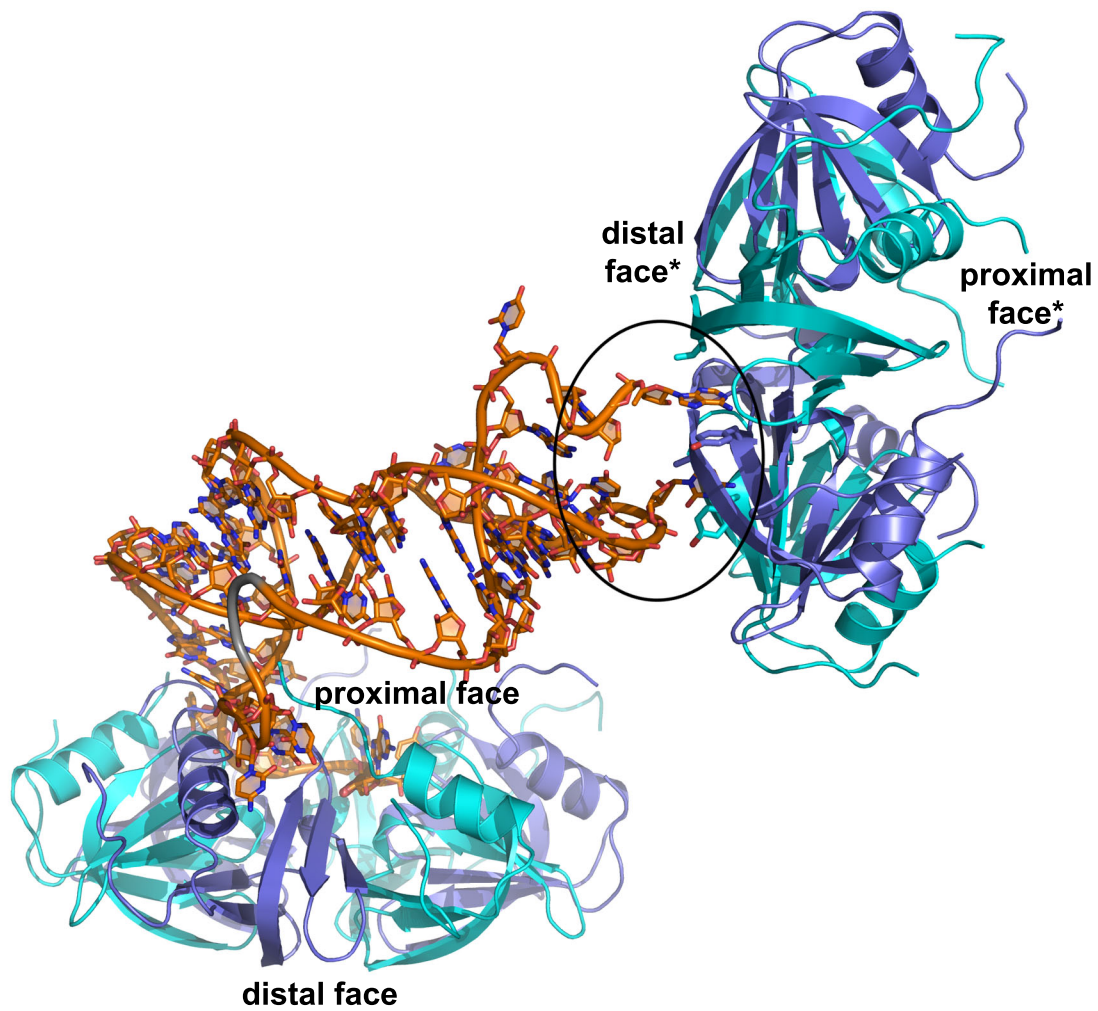**b**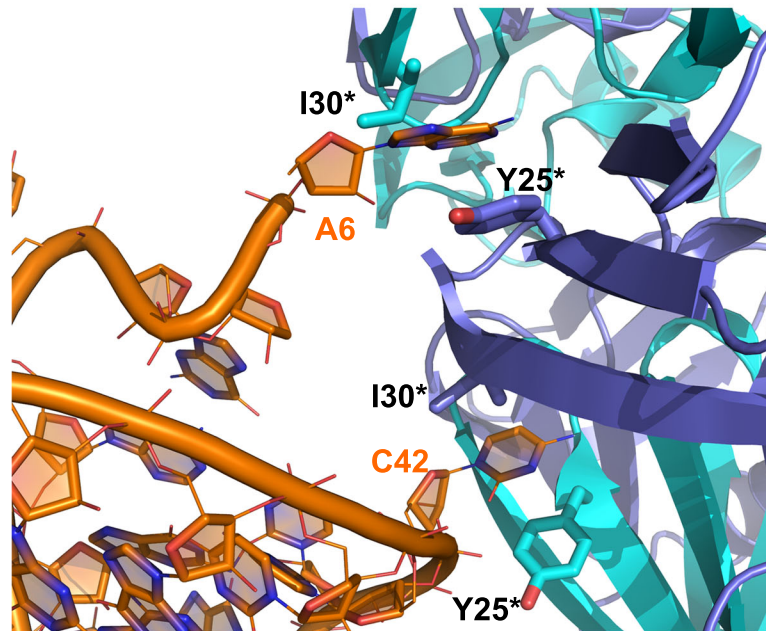

Supplement: supp [file elife-05375-supp-v1.zip]

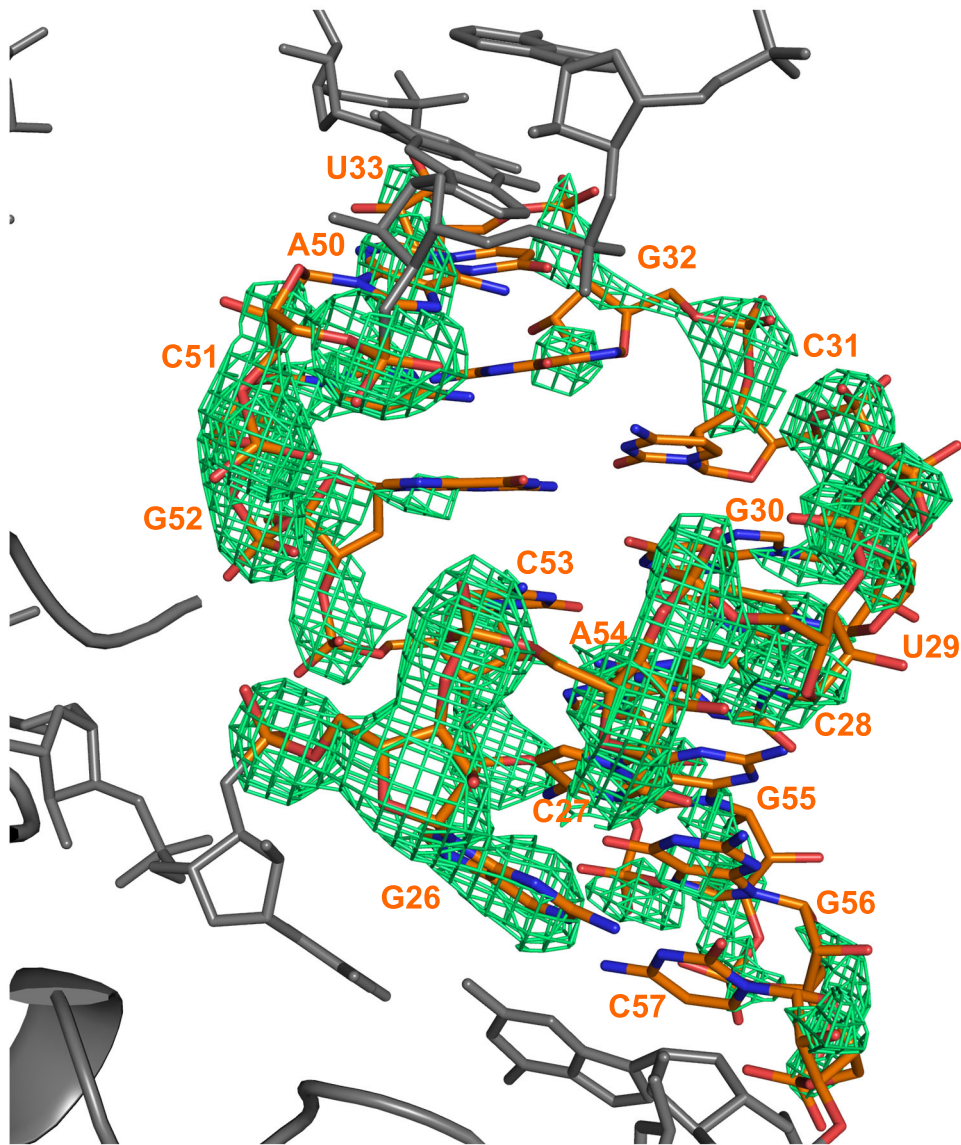

Supplement: supp [file elife-05375-supp-v1.zip]
